# Supplementary material
Source: PubMed Central journal article supplement (PMC6832070)
Supplement: JB.00371-19-s0001.pdf [file JB.00371-19-s0001.pdf]

## Supplemental Material to the manuscript:

### CidR and CcpA synergistically regulate *Staphylococcus aureus* *cidABC* expression.

Marat R. Sadykov<sup>†</sup>, Ian H. Windham<sup>†#</sup>, Todd J. Widhelm, Vijaya Kumar Yajjala, Sean M. Watson, Jennifer L. Endres, Arissa I. Bavari, Vinai C. Thomas, Jeffrey L. Bose<sup>1</sup>, Kenneth W. Bayles\*.

The Supplemental Material contains three tables (Table S1, Table S2 and Table S3) and two figures (Fig. S1 and Fig. S2).

Table S1. Strains and plasmids used in this study.

| Bacterial strain or plasmid | Relevant properties                                                                                                                                           | Source                          |
|-----------------------------|---------------------------------------------------------------------------------------------------------------------------------------------------------------|---------------------------------|
| <b>Strains</b>              |                                                                                                                                                               |                                 |
| <b><i>E. coli</i>:</b>      |                                                                                                                                                               |                                 |
| DH5 $\alpha$                | cloning host                                                                                                                                                  | Invitrogen                      |
| BL21                        | Expression strain, <i>F</i> <sup>-</sup> , <i>ompT</i> , <i>hsdS</i> ( <i>r<sub>B</sub></i> <sup>-</sup> <i>m<sub>B</sub></i> <sup>-</sup> ), gal, dcm (DE3)  | Invitrogen                      |
| Rosetta 2                   | <i>F</i> <sup>-</sup> <i>ompT hsdS<sub>B</sub></i> ( <i>r<sub>B</sub></i> <sup>-</sup> <i>m<sub>B</sub></i> <sup>-</sup> ) gal dcm pRARE2 (Cam <sup>R</sup> ) | Invitrogen                      |
| <b><i>S. aureus</i>:</b>    |                                                                                                                                                               |                                 |
| RN4220                      | restriction-deficient mutant of strain 8325-4                                                                                                                 | (Novick, 1991)                  |
| UAMS-1                      | clinical osteomyelitis isolate                                                                                                                                | (Gillaspy <i>et al.</i> , 1995) |
| JE2                         | plasmid-cured derivative of USA300 LAC                                                                                                                        | (Fey <i>et al.</i> , 2013)      |
| KB1090                      | UAMS-1 <i>cidR::tet</i> ; Tet <sup>R</sup>                                                                                                                    | (Yang <i>et al.</i> , 2005)     |
| KB6001                      | JE2; $\Delta$ <i>geh-PcidABC::lacZ</i>                                                                                                                        | This study                      |
| JE2 <i>ccpA::tet</i>        | JE2; $\Delta$ <i>ccpA::tetL</i> ; Tet <sup>R</sup>                                                                                                            | (Halsey <i>et al.</i> , 2017)   |
| UAMS-1- <i>ccpA</i>         | UAMS-1; $\Delta$ <i>ccpA::tetL</i> ; Tet <sup>R</sup>                                                                                                         | This study                      |
| UAMS-1- <i>ackA</i>         | UAMS-1; $\Delta$ <i>ackA::ermB</i> ; Erm <sup>R</sup> ;                                                                                                       | (Sadykov <i>et al.</i> , 2013)  |

|                             |                                                                                                                                |                                |
|-----------------------------|--------------------------------------------------------------------------------------------------------------------------------|--------------------------------|
| UAMS-1-<br><i>ackA/ccpA</i> | UAMS-1; $\Delta$ <i>ackA::ermB</i> ; Erm <sup>R</sup> ; $\Delta$ <i>ccpA::tetL</i> ; Tet <sup>R</sup>                          | This study                     |
| UAMS-1-<br><i>ackA/cidR</i> | UAMS-1; $\Delta$ <i>ackA::ermB</i> ; Erm <sup>R</sup> ; <i>cidR::tet</i> ; Tet <sup>R</sup>                                    | This study                     |
| UAMS-1- <i>pta</i>          | UAMS-1; $\Delta$ <i>pta</i>                                                                                                    | (Sadykov <i>et al.</i> , 2013) |
| UAMS-1- <i>pta/ccpA</i>     | UAMS-1; $\Delta$ <i>pta</i> ; $\Delta$ <i>ccpA::tetL</i> ; Tet <sup>R</sup>                                                    | This study                     |
| UAMS-1- <i>pta/cidR</i>     | UAMS-1; $\Delta$ <i>pta</i> ; <i>cidR::tet</i> ; Tet <sup>R</sup>                                                              | This study                     |
| <b>Plasmids</b>             |                                                                                                                                |                                |
| pIHW7                       | Promoterless <i>lacZ</i> reporter plasmid, derivative of pCN51; Amp <sup>R</sup> Erm <sup>R</sup>                              | (Windham <i>et al.</i> , 2016) |
| pIHW9                       | <i>cidABC</i> reporter plasmid; Amp <sup>R</sup> Erm <sup>R</sup> , 658 bp                                                     | This study                     |
| pIHW10-lac                  | <i>cidABC</i> reporter plasmid; Amp <sup>R</sup> Erm <sup>R</sup> , truncation -177 upstream of transcription start site       | This study                     |
| pIHW11-lac                  | <i>cidABC</i> reporter plasmid; Amp <sup>R</sup> Erm <sup>R</sup> , truncation -138 upstream of transcription start site       | This study                     |
| pIHW17-lac                  | <i>cidABC</i> reporter plasmid; Amp <sup>R</sup> Erm <sup>R</sup> , truncation -57 upstream of transcription start site        | This study                     |
| pIHW22-lac                  | <i>cidABC</i> reporter plasmid; Amp <sup>R</sup> Erm <sup>R</sup> , truncation -93 upstream of transcription start site        | This study                     |
| pIHW25                      | <i>geh</i> allelic exchange plasmid with <i>PcidABC::lacZ</i> reporter (pCL52.2 derivative); Tet <sup>R</sup> Spc <sup>R</sup> | This study                     |
| pSW1                        | derivative of pIHW10-lac lacking <i>cre</i> -site; Amp <sup>R</sup> Erm <sup>R</sup>                                           | This study                     |
| pCL52.2                     | Temperature-sensitive shuttle vector; Tet <sup>R</sup> Spc <sup>R</sup>                                                        | (Sau <i>et al.</i> , 1997)     |
| pET24b                      | IPTG-inducible <i>E. coli</i> expression plasmid; Kan <sup>R</sup>                                                             | Invitrogen                     |
| pET24b- <i>ccpA</i>         | pET24b with <i>ccpA</i> gene                                                                                                   | This study                     |
| pET24b- <i>cidR</i>         | pET24b with <i>cidR</i> gene                                                                                                   | This study                     |

---

**Table S2. Primers used in this study.**

| Primer designation | Nucleotide sequence (5' - 3')                                    |
|--------------------|------------------------------------------------------------------|
| IW10               | GGGATCCAGCAAATTATCAATGATGAAGTAGATATAGGC                          |
| IW11               | GGCTAGCGCCATCCCTTTCTAAATATGTCTAAATTGTTAC                         |
| IW15               | GGATCCCATATTAATAAAGCACTCATTATTTGTGATTCC                          |
| IW16               | GGATCCCTTGGATCATTGAAATAATGAGTGTTTTTTTTG                          |
| IW22               | GGATCCCAAACCATAAAAAAAGAGTATTTTTATATTG                            |
| IW27               | GAATTCTACATCCCTTGCTTATAGACACGATTAGTAATC                          |
| IW28               | GAGCTCGAAAAACAACACTGCACTTTCATATAACATGACA                         |
| IW29               | CTGCAGGTGCTACTAACATGGCACGGAAGATATAAGTAG                          |
| IW30               | AAGCTTCAACCAACAAAAGGTGCCATTGTCTACATTCAT                          |
| IW31               | GGATCCGAAATTTAGAGAGCGTTTCCATAGAAAATAGTA                          |
| IW44               | CTGCAGTGTCACCTTTGCTTGATATATGAGAATTATTTAA                         |
| IW110              | AGTGAAATTTAGAGAGCGTTTCCATAGAAAATAGTAATACAAACC<br>ATAAAAAAAGAGTAT |
| IW113              | ATACTCTTTTTTTATGGTTTGTATTACTATTTTCTATGGAAACGCTC<br>TCTAAATTTCACT |
| IW116              | GGCTAGCGAGGAAATTATGACAGTTACTATATATGATGTAGC                       |
| IW117              | GGCTCGAGTTTTGTAGTTCCTCGGTATTCAATTCTGTGTGG                        |
| IW128cc            | GGGCTAGCGTGGATATCAAACATATGAAATATTTTATT                           |
| IW129cc            | GGCTCGAGGCCTAAACGATCTTTCAAAAATTCTATCCA                           |
| IW176              | CATAGAAAAAAAATACAAACCATAAAAAAAGAGTATTT                           |
| IW177              | AAATACTCTTTTTTTATGGTTTGTATTTTTTTTTTTCTAT                         |
| cre*-cidABC-f      | GCAGTGTATCCAGGCTAGAAAATAGTAATACAAACCTATAAAAAAA<br>GAGT           |
| cre*-cidABC-r      | AATTTCACTTCATTTTCACAAAAAAACACTCA                                 |
| pCN51-S2-f         | CTGTGGATAACCGTATTACCGCC                                          |
| B-gal-S-r          | GATGACCATGATTACGGATTCACTGG                                       |
| SAV1737-f          | GCAACAAAGGACCATTTAACGATAATAC                                     |
| acuC-f             | GGTGGACTTGAAATATTCGCTACAG                                        |

|           |                                        |
|-----------|----------------------------------------|
| RT-cidR-f | TGAAGTAGATATAGGCGTGACCAC               |
| RT-cidR-r | GTTTCATATTTTGCAGATCGATGC               |
| RT-cidA-f | GCACAAAGTCCAATTAATAATCAAATTATTACTACAAC |
| RT-cidA-r | GTAAATAAAATAAAAATAGACCAACAATACTGCCG    |
| sigA-rt-F | AACTGAATCCAAGTCATCTTAGTC               |
| sigA-rt-R | TCATCACCTTGTTCAATACGTTTG               |
| ptsI-F    | CGGTAGTGATGAATCTGACG                   |
| ptsI-R    | CTTACAATGAATACTTCGGG                   |
| ptsH-F    | GAAGATTCTAACTATACGAAGGAG               |
| ptsH-R    | ATCAGATGCGGCAATACC                     |
| glkA-F    | CCAGAAGATATGTACGAAATG                  |
| glkA-R    | CCGTTCCAACCTGGAATAAC                   |

**Table S3. Transposon mutants with decreased  $P_{cidABC}::lacZ$  activity.**

| Locus         | Description                                              | Gene Name   |
|---------------|----------------------------------------------------------|-------------|
| SAUSA300_1327 | cell surface protein                                     | <i>ebh</i>  |
| SAUSA300_0659 | sugar efflux protein, MFS family, sugar:cation symporter |             |
| SAUSA300_0352 | ABC transporter, ATP-binding protein                     |             |
| SAUSA300_2645 | glucose-inhibited division protein A                     | <i>gidA</i> |
| SAUSA300_0983 | phosphocarrier protein HPr                               | <i>ptsH</i> |
| SAUSA300_0984 | phosphoenolpyruvate-protein phosphotransferase           | <i>ptsI</i> |
| SAUSA300_0388 | inosine-5'-monophosphate dehydrogenase                   | <i>guaB</i> |
| SAUSA300_1507 | glucokinase                                              | <i>glkA</i> |
| SAUSA300_2059 | ATP synthase F1, gamma subunit                           | <i>atpG</i> |
| SAUSA300_0495 | hypothetical protein                                     |             |
| SAUSA300_1902 | Conserved hypothetical protein, Lactonase                |             |
| SAUSA300_0552 | Conserved hypothetical protein, LmbE family protein      |             |
| SAUSA300_1624 | upstream of MutT/nudix family protein                    |             |

|               |                                                              |              |
|---------------|--------------------------------------------------------------|--------------|
| SAUSA300_0192 | Conserved hypothetical protein                               | <i>murQ?</i> |
| Intergenic    | metallopeptidase                                             |              |
| SAUSA300_2588 | preprotein translocase                                       | <i>SecY</i>  |
| Intergenic    | upstream of rrsC, 16s ribosomal RNA                          |              |
| SAUSA300_1393 | phiSLT ORF2067-like protein, phage tail tape measure protein |              |
| SAUSA300_1015 | cytochrome oxidase assembly protein                          | <i>ctaA</i>  |
| SAUSA300_0764 | ribonuclease R                                               | <i>rnr</i>   |
| SAUSA300_1259 | ImpB/MucB/SamB family protein; DNA damage repair             |              |
| SAUSA300_0123 | siderophore biosynthesis protein, IucC family                |              |
| SAUSA300_1286 | aspartate kinase                                             |              |

|                |     |   |   |     |   |   |
|----------------|-----|---|---|-----|---|---|
| μM CidR        | 1.5 | 2 | 2 | 1.5 | 2 | 2 |
| Competitor DNA | -   | - | + | -   | - | + |
| Lane           | 1   | 2 | 3 | 4   | 5 | 6 |

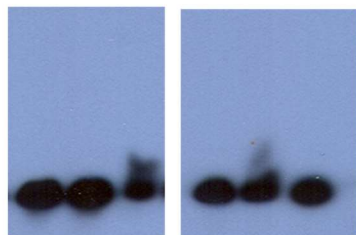

**Fig. S1. CidR does not bind to the regions upstream and downstream of the CidR binding site.**

EMSAs were performed using 1.5 and 2  $\mu$ M concentrations of purified CidR protein and biotin-labeled DNA fragments located downstream (lanes 1-3) and upstream (lanes 4-6) of the putative CidR-binding site.

**T****A****GAGAGCGTTTCCA**  
**WTGNAANCGNWNNCW**

**Fig. S2. Alignment of the *S. aureus* UAMS-1 *cre*-box with *cre*-site consensus of *B. subtilis*.**

N – A, T, C or G; W - T or A

## References

- Fey, P.D., Endres, J.L., Yajjala, V.K., Widhelm, T.J., Boissy, R.J., Bose, J.L., and Bayles, K.W. (2013) A genetic resource for rapid and comprehensive phenotype screening of nonessential *Staphylococcus aureus* genes. *MBio* **4**: e00537-00512.
- Gillaspay, A.F., Hickmon, S.G., Skinner, R.A., Thomas, J.R., Nelson, C.L., and Smeltzer, M.S. (1995) Role of the accessory gene regulator (*agr*) in pathogenesis of staphylococcal osteomyelitis. *Infect Immun* **63**: 3373-3380.
- Halsey, C.R., Lei, S., Wax, J.K., Lehman, M.K., Nuxoll, A.S., Steinke, L., Sadykov, M., Powers, R., and Fey, P.D. (2017) Amino Acid Catabolism in *Staphylococcus aureus* and the Function of Carbon Catabolite Repression. *MBio* **8**.
- Novick, R.P. (1991) Genetic systems in staphylococci. *Methods Enzymol* **204**: 587-636.
- Sadykov, M.R., Thomas, V.C., Marshall, D.D., Wenstrom, C.J., Moormeier, D.E., Widhelm, T.J., Nuxoll, A.S., Powers, R., and Bayles, K.W. (2013) Inactivation of the Pta-AckA pathway causes cell death in *Staphylococcus aureus*. *J Bacteriol* **195**: 3035-3044.
- Sau, S., Sun, J., and Lee, C.Y. (1997) Molecular characterization and transcriptional analysis of type 8 capsule genes in *Staphylococcus aureus*. *J Bacteriol* **179**: 1614-1621.
- Windham, I.H., Chaudhari, S.S., Bose, J.L., Thomas, V.C., and Bayles, K.W. (2016) SrrAB Modulates *Staphylococcus aureus* Cell Death through Regulation of *cidABC* Transcription. *J Bacteriol* **198**: 1114-1122.
- Yang, S.J., Rice, K.C., Brown, R.J., Patton, T.G., Liou, L.E., Park, Y.H., and Bayles, K.W. (2005) A LysR-type regulator, CidR, is required for induction of the *Staphylococcus aureus* *cidABC* operon. *J Bacteriol* **187**: 5893-5900.
